# Supplementary material for: The novel role of Kallistatin in linking metabolic syndromes and cognitive memory deterioration by inducing amyloid-β plaques accumulation and tau protein hyperphosphorylation
Source: eLife. 2025 Aug 5;13:RP99462. doi: 10.7554/eLife.99462 (PMC12324742; doi:10.7554/eLife.99462)
Supplement: Supplementary file 1. — N is an abbreviation for number; GLU is an abbreviation for glucose; TC is an abbreviation for total cholesterol; TG is an abbreviation for triglyceride; NA indicates not available; NS indicates no significance. **p < 0.01, ****p < 0.0001. [file elife-99462-supp1.xls]

## Sheet: S1
Table S1:
	NC	AD	p value
			(Dementia vs NC)
N	61	56	NA
Age	49-82	52-85	****
Average age	64±8.53	73.02±9.43	NA
Male	29	25	NS
Female	32	31
GLU (mmol/L)	5.07±0.65	6.73±2.81	****
TC (mmol/L)	4.63±0.58	4.50±1.12	NS
TG (mmol/L)	1.09±0.50	1.41±0.65	**
Clinical characteristic of AD patients. N is an abbreviation for number; GLU is an abbreviation for glucose; TC is an abbreviation for total cholesterol; TG is an abbreviation for triglyceride; NA indicates not available; NS indicates no significance. two asterisk, p < 0.01, four asterisk, p < 0.0001.
Table S2:
	NC	AD + DM	p value
			(Dementia+DM vs NC)
N	61	26	NA
Age	49-82	52-92	****
Average age	64±8.53	76.77±8.69	NA
Male	29	15	NS
Female	32	11
GLU (mmol/L)	5.07±0.65	8.12±3.05	****
TC (mmol/L)	4.63±0.58	4.29±1.04	NS
TG (mmol/L)	1.08±0.50	1.69±0.68	****
Clinical characteristic of AD patients with DM. N is an abbreviation for number; GLU is an abbreviation for glucose; TC is an abbreviation for total cholesterol; TG is an abbreviation for triglyceride; NA indicates not available; NS indicates no significance. four asterisk, p < 0.0001.

## Sheet: S2
Table S2:
	NC	AD + DM	p value
			(Dementia+DM vs NC)
N	61	26	NA
Age	49-82	52-92	****
Average age	64±8.53	76.77±8.69	NA
Male	29	15	NS
Female	32	11
GLU (mmol/L)	5.07±0.65	8.12±3.05	****
TC (mmol/L)	4.63±0.58	4.29±1.04	NS
TG (mmol/L)	1.08±0.50	1.69±0.68	****
Clinical characteristic of AD patients with DM. N is an abbreviation for number; GLU is an abbreviation for glucose; TC is an abbreviation for total cholesterol; TG is an abbreviation for triglyceride; NA indicates not available; NS indicates no significance. four asterisk, p < 0.0001.
